# Supplementary material
Source: publisher site journal article supplement (https://www.degruyterbrill.com/publication/journal_key/SATS/downloadAsset/SATS_SATS_Launches%20Book%20Reviews.pdf)

# SATS - Northern European Journal of Philosophy

## Book Reviews

We are greatly pleased to announce that *SATS – Northern European Journal of Philosophy* will launch its very own book review section from 2022 and onwards with Martin Friis Nielsen and Arman Teymouri Niknam as book review editors.

Our book review section particularly aims to engage with and provide a venue for books in English that contextualize philosophy or put philosophy to work beyond specialised philosophical discussions by bringing it into dialogue and fruitful exchange with other fields, including, but not limited to, literature studies, media studies, anthropology, history, theology, sociology, the natural sciences, computer science or STS studies.

We very much welcome reviews of books that are published outside of the big university presses and which, in line with SATS' interdisciplinary vision, in novel ways use philosophy to deal with and address the concerns of contemporary societies. As a Northern European journal rooted in Scandinavia, we are also interested in reviews of books that expound on ideas and thinkers related to a Scandinavian context.

Please see [SATS Book Review Guidelines](#) for further information regarding our book review section.

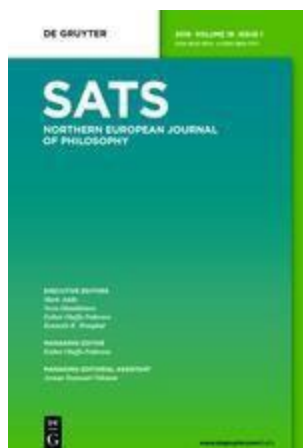

Supplement: Supplementary file 1 [file SATS_SATS_Launches%20Book%20Reviews.pdf]
